# Supplementary material for: ‘Candidatus Liberibacter Asiaticus’ SDE1 Effector Induces Huanglongbing Chlorosis by Downregulating Host DDX3 Gene
Source: PubMed Central journal article supplement (PMC7662370; doi:10.3390/ijms21217996), 2020-10-27
Supplement: ijms-21-07996-s001.pdf [file ijms-21-07996-s001.pdf]

**Table S1.** Bacterial strains and plasmids used in this study.

Table S1. Bacterial strains and plasmids used in this study

| Strains or plasmids              | Relevant characteristics                                                                                                                        | Resources  |
|----------------------------------|-------------------------------------------------------------------------------------------------------------------------------------------------|------------|
| <b>Strains</b>                   |                                                                                                                                                 |            |
| <i>Escherichia coli</i>          |                                                                                                                                                 |            |
| DH5 $\alpha$                     | <i>F</i> <i>recA hsdR17</i> ( <i>rk</i> <sup>-</sup> , <i>mk</i> <sup>+</sup> ) $\phi$ 80 <i>lacZ</i> $\Delta$ M15                              | Clontech   |
| Yeast                            |                                                                                                                                                 |            |
| AH109                            | MATa, <i>trp1-901</i> , <i>leu2-3, 112</i> , <i>ura3-52</i> , <i>His3-200</i> , <i>gal4</i> , <i>gal80</i> , <i>LYS2::GAL1UAS-GAL1TATA-His3</i> | Clontech   |
| <i>Agrobacterium tumefaciens</i> |                                                                                                                                                 |            |
| GV3101                           | Rif <sup>r</sup> , with Ti plasmid pMP90                                                                                                        | [1]        |
| <b>Plasmids</b>                  |                                                                                                                                                 |            |
| pHB                              | Km <sup>r</sup> , a binary vector to express gene under control of a double CaMV 35S promoter                                                   | [2]        |
| pHB-SDE1                         | Km <sup>r</sup> , the 465-bp coding sequence of full length <i>SDE1</i> cloned in pHB                                                           | This study |
| pHB-SDE1mp                       | Km <sup>r</sup> , the 393-bp DNA fragment coding for SDE1mp lacking signal peptide cloned in pHB                                                | This study |
| pGDR                             | Km <sup>r</sup> , RFP transient expression vector                                                                                               | [3]        |
| pGDR-SDE1                        | Km <sup>r</sup> , a 465-bp coding sequence of <i>SDE1</i> cloned into pGDR                                                                      | This study |
| pGDR-SDE1mp                      | Km <sup>r</sup> , a 393-bp coding sequence of SDE1mp cloned into pGDR                                                                           | This study |
| pGDG                             | Km <sup>r</sup> , GFP transient expression vector                                                                                               | [3]        |
| pGDG-NbDDX3                      | Km <sup>r</sup> , a 1413-bp <i>NbDDX3</i> gene cloned into pGDG                                                                                 | This study |
| pGBKT7                           | Km <sup>r</sup> , GAL4(1-147) DNA-BD, TRP1, c-Myc epitope tag                                                                                   | Clontech   |
| pGBKT7-SDE1                      | A 465-bp coding sequence of <i>SDE1</i> cloned in pGBKT7                                                                                        | This study |
| pGADT-7                          | Amp <sup>r</sup> , GAL4(768-881) AD, <i>LEU2</i> , HA epitope tag                                                                               | Clontech   |
| pGADT7-CsDDX3                    | Amp <sup>r</sup> , the 1413-bp <i>CsDDX3</i> genes cloned in pGADT7                                                                             | This study |
| TRV1                             | Km <sup>r</sup> , a VIGS vector encoding the replication, movement and cysteine-rich protein proteoins of tobacco rattle virus                  | [4]        |
| TRV2                             | Km <sup>r</sup> , a VIGS vector harboring the coat protein and two non-structural proteins of tobacco rattle virus                              | [4]        |

|              |                                                                                                                                 |            |
|--------------|---------------------------------------------------------------------------------------------------------------------------------|------------|
| TRV-NbPDS    | Km <sup>r</sup> , a 369-bp DNA fragment of <i>NbPDS</i> cloned in TRV-RNA2                                                      | [4]        |
| TRV-NbDDX3   | Km <sup>r</sup> , a 437-bp DNA fragment of <i>NbDDX3</i> cloned in TRV-RNA2                                                     | This study |
| 1301-YC      | Km <sup>r</sup> , derived from pCAMBIA1301 which encodes the C-terminal portion of YFP                                          | [5]        |
| YC-SDE1mp    | Km <sup>r</sup> , a 393-bp DNA fragment coding for SDE1mp cloned in 1301-Yc                                                     | This study |
| 1301-YN      | Km <sup>r</sup> , derived from pCAMBIA1301 which encodes the N-terminal portion of YFP                                          | [5]        |
| YN-NbDDX3    | Km <sup>r</sup> , a 1413-bp <i>NbDDX3</i> gene cloned in 1301-YN                                                                | This study |
| SRC2-1-GFP   | Gm <sup>r</sup> , a SRC2-1 GFP fusion in gateway vector pDONR207                                                                | [6]        |
| pGADT7-VemR  | Amp <sup>r</sup> , the 384-bp full length of <i>vemR</i> genes cloned in pGADT7-AD vector at <i>NdeI</i> and <i>EcoRI</i> sites | [7]        |
| pGBKT7-RpoN2 | Km <sup>r</sup> , the 1404-bp full length of <i>rpoN2</i> gene cloned in pGBKT7-BD vector at <i>NdeI</i> and <i>EcoRI</i> sites | [7]        |

## References

- Koncz, C.; Schell, J. The promoter of TL-DNA gene 5 controls the tissuespecific expression of chimeric genes carried by a novel type of *Agrobacterium* binary vector. *Mol. Gen. Genet.* **1986**, *204*, 383–396.
- Mao, J.; Zhang, Y.C.; Sang, Y.; Li, Q.H.; Yang, H.Q. A role for *Arabidopsis* cryptochromes and COP1 in the regulation of stomatal opening. *Proc. Natl. Acad. Sci. USA* **2005**, *102*, 12270–12275.
- Goodin, M.M.; Dietzgen, R.G.; Schichnes, D.; Ruzin, S.; Jackson, A.O. pGD vectors: versatile tools for the expression of green and red fluorescent protein fusions in agroinfiltrated plant leaves. *Plant J.* **2002**, *31*, 375–383.
- Liu, Y.; Schiff, M.; Dinesh-Kumar, S.P. Tobacco *Rar1*, *EDS1* and *NPR1/NIM1* like genes are required for N-mediated resistance to tobacco mosaic virus. *Plant J.* **2002**, *30*, 415-429.
- Li, Y.R.; Che, Y.Z.; Zou, H.S.; Cui, Y.P.; Guo, W.; Zou, L.F.; Biddle, E.M.; Yang, C.H.; Chen, G.Y. Hpa2 required by HrpF to translocate *Xanthomonas oryzae* transcriptional activator-like effectors into rice for pathogenicity. *Appl Environ Microbiol.* **2011**, *77*, 3809-3818.
- Liu, Z.Q.; Qiu, A.L.; Shi, L.P.; Cai, J.S.; Huang, X.Y.; Yang, S.; Wang, B.; Shen, L.; Huang, M.K.; Mou, S.L.; Ma, X.L.; Liu, Y.Y.; Lin, L.; Wen, J.Y.; Tang, Q.; Shi, W.; Guan, D.Y.; Lai, Y.; He, S.L. SRC2-1 is required in PcINF1-induced pepper immunity by acting as an interacting partner of PcINF1. *J. Exp. Bot.* **2015**, *66*, 3683-3698.
- Wu, W.; Zhao, Z.; Luo, X.; Fan, X.; Zhuo, T.; Hu, X.; Liu, J.; Zou, H. Response regulator VemR regulates the transcription of flagellar rod gene *flgG* by interacting with  $\sigma^{54}$  factor RpoN2 in *Xanthomonas citri* ssp. *citri*. *Mol. Plant Pathol.* **2019**, *20*, 372–381.

Table S2. Primers for molecular cloning and qRT-PCR in this study

| Primer pair                                                             | Sequence(5'-3')                                                | Cutting sites               | Description or purpose                                                                    |
|-------------------------------------------------------------------------|----------------------------------------------------------------|-----------------------------|-------------------------------------------------------------------------------------------|
| Primers used for molecular cloning                                      |                                                                |                             |                                                                                           |
| SDE1.pHB.F/SDE1.pHB.R                                                   | TTGGATCCATGCGTAAAAATTTATTAACCT<br>TTGAGCTCTCAAGACTGCTCCAACATTT | <i>Bam</i> HI- <i>Sac</i> I | A 465-bp coding sequence of full length <i>SDE1</i> cloned into pHB                       |
| SDE1mp.pHB.F1                                                           | TTGGATCCATGGGCAGTAGTTTTGGTTGTTG<br>(Combined with SDE1.pHB.R)  | <i>Bam</i> HI- <i>Sac</i> I | A 393-bp DNA fragment coding for SDE1mp cloned into pHB                                   |
| SDE1.RFP.F/ SDE1.RFP.R                                                  | TCGTCGACATGCGTAAAAATTTATTAACCT<br>TCGGATCCAGACTGCTCCAACATTTTC  | <i>Sal</i> I- <i>Bam</i> HI | A 465-bp coding sequence of <i>SDE1</i> cloned into pGDR                                  |
| SDE1mp.RFP.F                                                            | TCGTCGACATGGGCAGTAGTTTTGGTTGTTG<br>(Combined with SDE1.RFP.R)  | <i>Sal</i> I- <i>Bam</i> HI | A 393-bp coding sequence of <i>SDE1mp</i> cloned into pGDR                                |
| SDE1.BD.F/ SDE1.BD.R                                                    | TCGAATTCATGCGTAAAAATTTATTAACCT<br>TCCTGCAGAGACTGCTCCAACATTTTC  | <i>Eco</i> RI- <i>Pst</i> I | A 465-bp coding sequence of <i>SDE1</i> cloned into pGBKT7                                |
| NbDDX3.Ri.F/ NbDDX3.Ri.R                                                | GCTCTAGAGCCTGGCTGGGTAAAG<br>GGGGTACCCAGAGCGATGAACAAAAGT        | <i>Xba</i> I- <i>Kpn</i> I  | A 437-bp DNA fragment of <i>NbDDX3</i> cloned in TRV-RNA2 for antisense                   |
| NbPSMD14.Ri.F/<br>NbPSMD14.Ri.R                                         | GCTCTAGACCCTCCTACTCTGGACTCTT<br>GGGGTACCTCTACCGTGGCTCTTGG      | <i>Xba</i> I- <i>Kpn</i> I  | A 467-bp DNA fragment of <i>NbPSMD14</i> cloned in TRV-RNA2 for antisense                 |
| Niben101Scf05290g02006.1.Ri.F<br>/<br>Niben101Scf05290g02006.1.Ri.<br>R | GCTCTAGACAAAGCGGAGCAAACA<br>GGGGTACCCACAAGATGAGGCAGAG          | <i>Xba</i> I- <i>Kpn</i> I  | A 438-bp DNA fragment of <i>Niben101Scf05290g02006.1</i> cloned in TRV-RNA2 for antisense |
| Niben101Scf04231g02014.1.Ri.F<br>/<br>Niben101Scf04231g02014.1.Ri.<br>R | GCTCTAGATAGGGAAACGAGTTGTGAA<br>GGGGTACCAGGGCGGAAGAAGGTC        | <i>Xba</i> I- <i>Kpn</i> I  | A 317-bp DNA fragment of <i>Niben101Scf04231g02014.1</i> cloned in TRV-RNA2 for antisense |
| NbDDX3.GFP.F/<br>NbDDX3.GFP.R                                           | GCGTCGACATGCTCGCAGTTGGATTTG<br>CGGGATCCATAGTCCCTTTTGTAGGGCA    | <i>Sal</i> I- <i>Bam</i> HI | A 1413-bp <i>NbDDX3</i> gene cloned into pGDG                                             |

|                          |                                                                                 |                   |                                                             |
|--------------------------|---------------------------------------------------------------------------------|-------------------|-------------------------------------------------------------|
| SDE1mp.Yc.F/ SDE1mp.Yc.R | <u>GCTCTAGA</u> AATGGGCAGTAGTTTTGGTTGTTG<br>GGGT <u>ACCAGACTGCTCCAACATTTTTC</u> | <i>XbaI-KpnI</i>  | A 393-bp DNA fragment coding for SDE1mp cloned into 1301-YC |
| NbDDX3.Yn.F/ NbDDX3.Yn.R | <u>GCTCTAGA</u> AATGCTCGCAGTTGGATTTG<br>GGGT <u>ACCATAGTCCCTTTTGTTAGGGCA</u>    | <i>XbaI-KpnI</i>  | A 1413-bp <i>NbDDX3</i> gene cloned into 1301-YN            |
| CsDDX3.F/CsDDX3.R        | <u>TCGAATTC</u> ATGCTTGCAGTTGGATTT<br><u>TCCTGCAGC</u> AGTTAGGACATTCAGAT        | <i>EcoRI-PstI</i> | A 1488-bp <i>CsDDX3</i> gene cloned into pGADT7             |

Primers used for qRT-PCR analysis

| <b>Gene</b>   | <b>Sequence(5'-3')</b>                                       | <b>Description</b> |
|---------------|--------------------------------------------------------------|--------------------|
| <i>NbEF1a</i> | TGGTGCCTCAAGCCTGGTATGGTTG;<br>ACGCTTGAGATCCTTAACCGCAACATTCTT | 160-bp             |
| <i>SDE1</i>   | CCATATGCGTCCTTTCACCAA; GAGATTGAGGAGCAGAACCCC                 | 125-bp             |
| <i>NbDDX3</i> | GTTTTACACAGACAAAGCGAGATG; CCCTCTGATGTTGAGAAATGTCG            | 103-bp             |
| <i>CsCOX</i>  | GTATGCCACGTCGCATTCCAGA; GCCAAAAGCTGCTAAGGGCATTG              | 68-bp              |
| <i>CsDDX3</i> | AAAACCTTCCACCCAAGCGACAGAG; CCCTCTGCAAGCTTTTCGTCTTGGT         | 139-bp             |

---

Underlined are restriction enzyme sites at 5' end of each primers

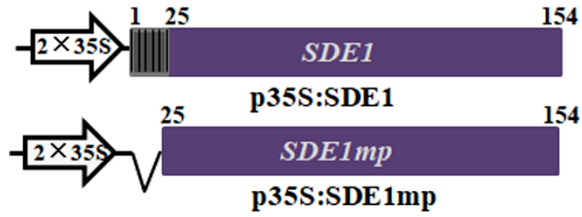

**Figure S1** Schematic diagram of full-length SDE1 and mature SDE1 (SDE1mp) for transient expression. The N-terminal 24 amino acids were deleted to generate SDE1mp.

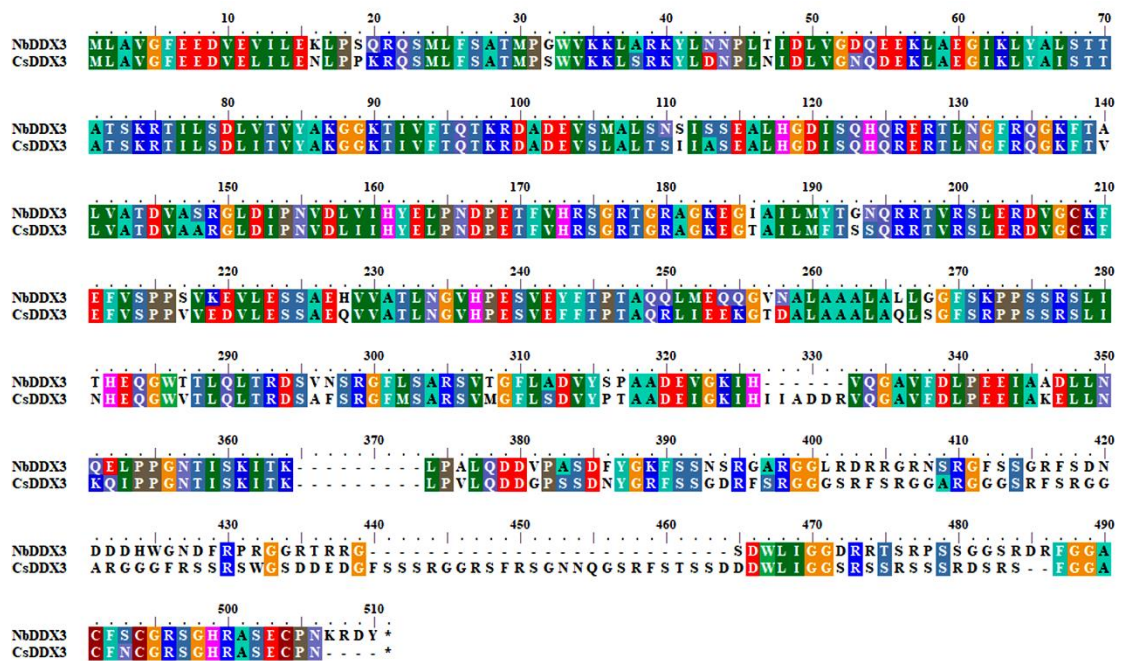

**Figure S2** Alignment of amino acid sequences between NbDDX3 and CsDDX3.

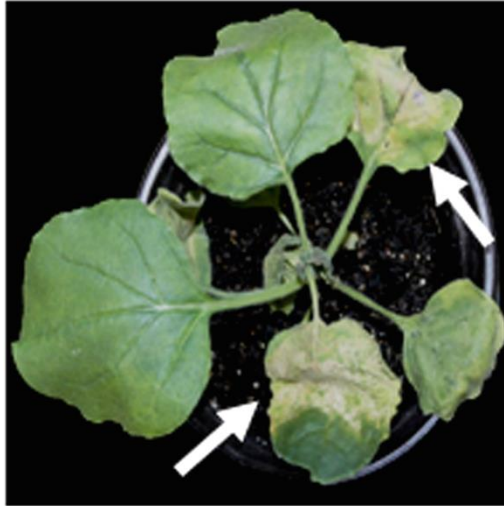

*TRV:NbPSMD14*

**Figure S3** Silencing of *NbPSMD14* gene in *N. benthamiana*. Growth phenotypes were scored at 15 dpi. White arrows indicate leaf death in silenced plants.
